# Supplementary material for: A combination of photodynamic therapy and antimicrobial compounds to treat skin and mucosal infections: a systematic review
Source: Royal Society of Chemistry journal article supplement (doi:10.1039/c8pp00534f), 2019-02-15
Supplement: c8pp00534f2.pdf [file c8pp00534f2.pdf]

### Supplementary Material Figure 1\_Legend

**Supplementary Material Figure 1.** Simplified diagram of the photodynamic reaction.  $e^-$ : electron;  $H_2O_2$ : hydrogen peroxide;  $h\nu$ : photons (light);  $\cdot O_2^-$ : superoxide anion;  $^1O_2$ : singlet oxygen  $^3O_2$ : molecular oxygen;  $\cdot OH$ : hydroxyl radical; PS: photosensitizer in basal state;  $^1PS^*$ : photosensitizer in its singlet state;  $^3PS^*$ : photosensitizer in excited triplet state; ROS: reactive oxygen species.
