# Supplementary figures and images for: A combination of photodynamic therapy and antimicrobial compounds to treat skin and mucosal infections: a systematic review
Source: Royal Society of Chemistry journal article supplement (doi:10.1039/c8pp00534f), 2019-02-15

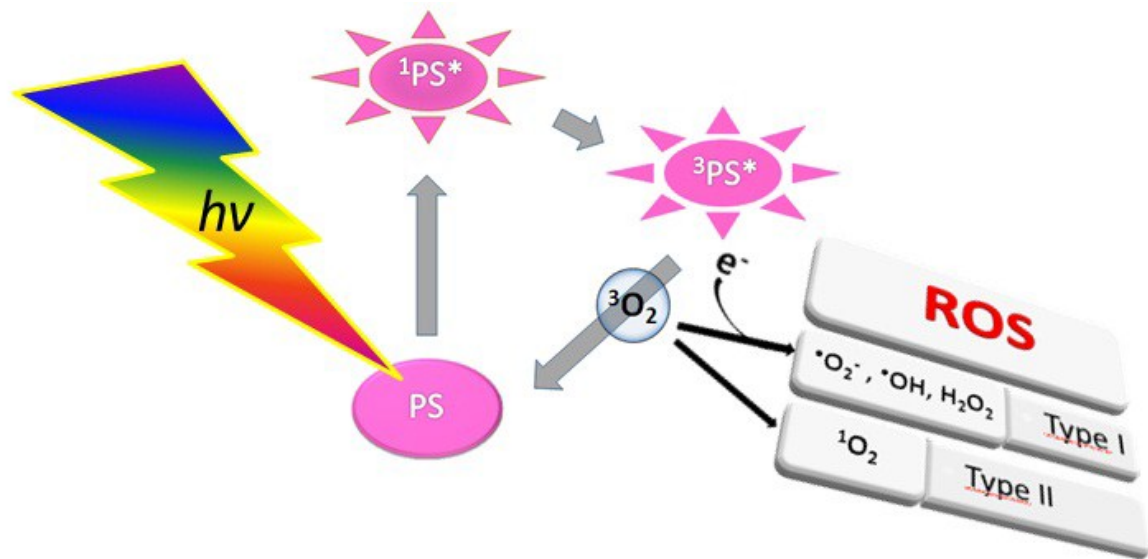

Supplement: c8pp00534f1.pdf [file c8pp00534f1.pdf]
